# Supplementary material
Source: PubMed Central journal article supplement (PMC7063836)
Supplement: joces-133-241828-s1.pdf [file joces-133-241828-s1.pdf]

## Supplementary Movie

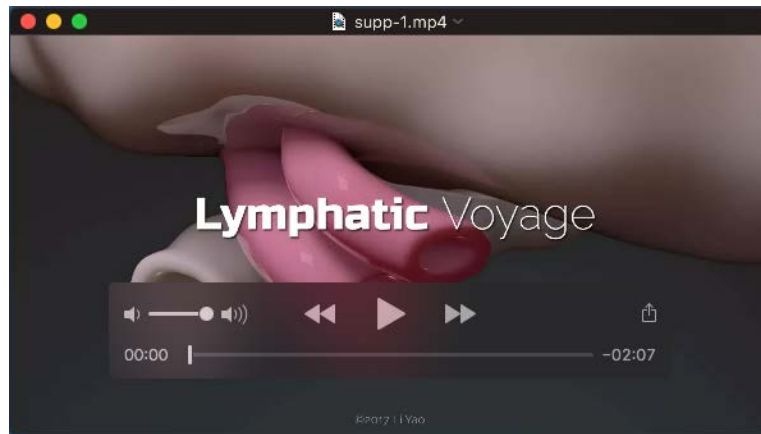

**Movie 1.** This 3D animation features a mouse lymph node that has been segmented, optimized, and rendered by Li Yao based on high-resolution tissue imaging data. This imaging data was generated by Weizhe Li from the Germain laboratory using clearing-enhanced 3D microscopy (C<sub>e</sub>3D) (Li et al., 2017).
